# Supplementary material for: Renin-angiotensin system blockers and residual kidney function loss in patients initiating peritoneal dialysis: an observational cohort study
Source: PubMed Central journal article supplement (PMC5473971; doi:10.1186/s12882-017-0616-4), 2017-06-17
Supplement: 12882_2017_616_MOESM1_ESM.pdf [file 12882_2017_616_MOESM1_ESM.pdf]

1 **Table S1:** Comorbidity definition by USRDS Medical Evidence Report comorbid  
 2 condition and ICD9 diagnosis code<sup>1</sup>.

| <b>Comorbidity</b>          | <b>Medical Evidence Report comorbid condition</b>                                                                        | <b>ICD9 diagnosis code</b>                                                                                                                                                                     |
|-----------------------------|--------------------------------------------------------------------------------------------------------------------------|------------------------------------------------------------------------------------------------------------------------------------------------------------------------------------------------|
| Cancer                      | Malignant neoplasm, cancer                                                                                               | 140.x-165.x, 170.x-172.x, 174.x, 175.x, 180.x-209.x, 238.6, 273.3                                                                                                                              |
| Cardiac disease, other      |                                                                                                                          | 427.3x, 426.x, 427.0, 427.20, 427.81, 427.9, 37.9x, 996.04, v53.32, 37.7x, 37.8x, 996.01, v45.00, v45.01, v45.02, v45.09, v53.31, 394.x-397.1, 424.x, 746.3-746.6, v42.2, v43.3, 427.1, 427.4x |
| Cerebrovascular disease     | Cerebrovascular disease<br>cerebrovascular accident, transient<br>ischemic attack                                        | 433.x, 434.x, 437.x, 438x, 433.x, 434.x, 436.00, 435.x                                                                                                                                         |
| Coronary artery disease     | Atherosclerotic heart disease                                                                                            | 410.x, 412, 414.0x, 36.2x, 36.1x, 00.66, 36.06, 36.07, 36.09, 411.x, 413.x                                                                                                                     |
| Diabetes mellitus           | Diabetes, currently on insulin<br>Diabetes, on oral medications<br>Diabetes, without medications<br>Diabetic retinopathy | 249.x, 250.x, 357.2, 362.0x                                                                                                                                                                    |
| Heart failure               | Congestive heart failure                                                                                                 | 398.91, 402.01, 402.11, 402.91, 404.01, 404.03, 404.13, 404.91, 428.x                                                                                                                          |
| Hyperkalemia                |                                                                                                                          | 276.7                                                                                                                                                                                          |
| Hyperlipidemia              |                                                                                                                          | 272.x                                                                                                                                                                                          |
| Hypertension                |                                                                                                                          | 401.0, 401.1, 401.9, 402.x, 403.x, 404.x, 405.x                                                                                                                                                |
| Liver disease               | NA                                                                                                                       | 070.x, 456.1, 456.21, 570-573.x, v42.7                                                                                                                                                         |
| Peripheral vascular disease | Peripheral vascular disease<br>Amputation                                                                                | 38.03, 38.04, 38.05, 38.08, 38.33-38.48, 39.22-39.29, 440.2x, 440.3x, 440.4x, 441.x, 443.x, 445.x, 447.10, 557.10, 557.90, v43.4                                                               |
| Pulmonary disease           | Chronic obstructive pulmonary<br>disease                                                                                 | 490, 491.x-496, 500-505, 506.4, 516.x, 416.x, 417.9                                                                                                                                            |
| Tobacco use                 |                                                                                                                          | 305.1x                                                                                                                                                                                         |

3

<sup>1</sup> Comorbidities were assigned either if they were present on the Medical Evidence Report, or if coded in at least one inpatient claim or two outpatient claims at least 1 day apart.

- 1 **Table S2:** Characteristics of U.S. patients initiating peritoneal dialysis from
- 2 2007-2011 excluded from the analysis for missing residual kidney function data.

| Variable                                                                  | Full cohort        |                            | Std. diff. |
|---------------------------------------------------------------------------|--------------------|----------------------------|------------|
|                                                                           | Non-users<br>N=473 | ACEI/ARB<br>users<br>N=339 |            |
| <b>Demographics</b>                                                       |                    |                            |            |
| Age (yr, mean $\pm$ SD)                                                   | 67 $\pm$ 13        | 65 $\pm$ 13                | 0.13       |
| Male sex                                                                  | 51                 | 43                         | 0.14       |
| Race                                                                      |                    |                            |            |
| Black                                                                     | 20                 | 23                         | 0.06       |
| White                                                                     | 74                 | 72                         | 0.06       |
| Other                                                                     | 5                  | 5                          | 0.00       |
| Hispanic ethnicity                                                        | 9                  | 18                         | 0.26       |
| Medicaid at time of<br>dialysis initiation                                | 27                 | 38                         | 0.23       |
| <b>Reported comorbidities</b>                                             |                    |                            |            |
| Cancer                                                                    | 13                 | 9                          | 0.14       |
| Cardiac disease, other <sup>a</sup>                                       | 30                 | 24                         | 0.14       |
| Cerebrovascular disease                                                   | 13                 | 15                         | 0.06       |
| Coronary artery disease                                                   | 27                 | 23                         | 0.11       |
| Diabetes mellitus                                                         | 58                 | 73                         | 0.30       |
| Heart failure                                                             | 32                 | 31                         | 0.02       |
| Hyperkalemia                                                              | 4                  | 7                          | 0.12       |
| Hyperlipidemia                                                            | 22                 | 23                         | 0.04       |
| Hypertension                                                              | 92                 | 97                         | 0.24       |
| Liver disease                                                             | 3                  | 3                          | 0.00       |
| Peripheral vascular<br>disease                                            | 16                 | 19                         | 0.07       |
| Pulmonary disease                                                         | 17                 | 16                         | 0.04       |
| Tobacco use                                                               | 6                  | 6                          | 0.02       |
| Days hospitalized in in the<br>first 90 days of<br>dialysis (median, IQR) | 0 (0-4)            | 0 (0-5)                    | 0.04       |
| <b>Baseline medication use</b>                                            |                    |                            |            |
| ACEI or ARB                                                               |                    |                            |            |
| ACEI                                                                      | 0                  | 60                         | NA         |
| ARB                                                                       | 0                  | 47                         | NA         |
| Both                                                                      | 0                  | 7                          | NA         |
| Beta blocker                                                              | 58                 | 65                         | 0.15       |
| Calcium channel blocker                                                   | 54                 | 60                         | 0.13       |
| Diuretic                                                                  | 53                 | 70                         | 0.36       |
| Other antihypertensive <sup>b</sup>                                       | 38                 | 43                         | 0.09       |
| Statin                                                                    | 49                 | 53                         | 0.08       |
| Clopidogrel                                                               | 15                 | 14                         | 0.04       |
| Warfarin                                                                  | 9                  | 7                          | 0.05       |

|                                                         |            |            |      |
|---------------------------------------------------------|------------|------------|------|
| Other cardiovascular med <sup>c</sup>                   | 21         | 21         | 0.00 |
| Levothyroxine                                           | 18         | 17         | 0.04 |
| <b>Dialysis characteristics</b>                         |            |            |      |
| Saw nephrologist prior to dialysis initiation           | 82         | 82         | 0.00 |
| Year initiated dialysis                                 |            |            |      |
| 2007                                                    | 19         | 20         | 0.04 |
| 2008                                                    | 20         | 20         | 0.01 |
| 2009                                                    | 20         | 22         | 0.05 |
| 2010                                                    | 21         | 20         | 0.04 |
| 2011                                                    | 21         | 19         | 0.05 |
| CAPD (vs. CCPD)                                         | 44         | 50         | 0.13 |
| <b>Vital signs and laboratory measurements</b>          |            |            |      |
| BMI (mean ± SD) <sup>d</sup>                            | 28.8 ± 7.2 | 29.6 ± 6.7 | 0.11 |
| Hemoglobin (g/dL, mean ± SD)                            | 10.5 ± 1.7 | 10.6 ± 1.4 | 0.07 |
| Albumin (g/dL, mean ± SD)                               | 3.5 ± 0.6  | 3.5 ± 0.7  | 0.08 |
| <b>Facility characteristics</b>                         |            |            |      |
| Number of PD patients (median, IQR) <sup>e</sup>        | 26 (15-41) | 24 (14-43) | 0.03 |
| ≥20                                                     | 64         | 62         | 0.03 |
| Urban <sup>f</sup>                                      | 89         | 88         | 0.03 |
| Geographic location (U.S. census division) <sup>g</sup> |            |            |      |
| East North Central                                      | 16         | 17         | 0.02 |
| East South Central                                      | 9          | 8          | 0.03 |
| Middle Atlantic                                         | 7          | 4          | 0.13 |
| Mountain                                                | 5          | 4          | 0.04 |
| New England                                             | 6          | 7          | 0.03 |
| Pacific                                                 | 13         | 21         | 0.20 |
| South Atlantic                                          | 18         | 19         | 0.03 |
| West North Central                                      | 9          | 4          | 0.20 |
| West South Central                                      | 17         | 17         | 0.01 |

1

2

3 All numbers are percentages unless indicated otherwise. ACEI angiotensin-converting enzyme  
4 inhibitor; ARB angiotensin-II receptor blocker; BMI body mass index; CAPD continuous  
5 ambulatory peritoneal dialysis; CCPD continuous cycling peritoneal dialysis; eGFR estimated  
6 glomerular filtration rate; IQR interquartile range; IPTW inverse probability of treatment  
7 weighted; PD peritoneal dialysis; SD standard deviation; Std. Diff. standardized difference.

8 <sup>a</sup> Includes atrial fibrillation, arrhythmias, implanted cardiac defibrillators, pacemakers, and  
9 valvular disease.

10 <sup>b</sup> Includes alfuzosin, aliskiren, clonidine, doxazosin, guanfacine, hydralazine, isosorbide,  
11 methyldopa, minoxidil, prazosin, ranolazine, and terazosin.

1 <sup>c</sup> Includes ezetimibe, simvastatin, niacin, amiodarone, aspirin/dipyridamole, colestivelam,  
2 colestipol, digoxin, dipyridamole, dronedarone, fenofibrate, flecainide, gemfibrozil, mexiletine,  
3 nitroglycerin, omega-3 acid ethyl esters, procainamide, propafenone, and quinidine.

4 <sup>d</sup> Missing for 11% of non-users and 1% of users.

5 <sup>e</sup> Based on the year the patient initiated dialysis.

6 <sup>f</sup> Facilities were considered urban if they were classified as a metropolitan area in the Rural–  
7 Urban Commuting Area (RUCA) Codes version 2.0, which are based on 2000 Census  
8 commuting data and 2004 zip codes; all other areas were considered to be rural.<sup>1</sup>

9 <sup>g</sup> Facilities were categorized into one of nine U.S. Census Bureau Divisions based on their state.<sup>2</sup>

1 **Table S3:** Characteristics of patients initiating peritoneal dialysis from 2007-2011 whose  
 2 baseline rGFR was  $\leq 20$  ml/min.

| Variable                                                         | Full cohort        |                            |               | IPTW Cohort |                   |               |
|------------------------------------------------------------------|--------------------|----------------------------|---------------|-------------|-------------------|---------------|
|                                                                  | Non-users<br>N=485 | ACEI/ARB<br>users<br>N=379 | Std.<br>diff. | Non-users   | ACEI/ARB<br>users | Std.<br>diff. |
| <b>Demographics</b>                                              |                    |                            |               |             |                   |               |
| Age (yr, mean $\pm$ SD)                                          | 66 $\pm$ 14        | 64 $\pm$ 13                | 0.15          | 66 $\pm$ 19 | 66 $\pm$ 19       | 0.00          |
| Male sex                                                         | 44                 | 43                         | 0.02          | 56          | 57                | 0.02          |
| Race                                                             |                    |                            |               |             |                   |               |
| Black                                                            | 16                 | 17                         | 0.03          | 16          | 16                | 0.00          |
| White                                                            | 79                 | 75                         | 0.10          | 78          | 78                | 0.00          |
| Other                                                            | 5                  | 7                          | 0.08          | 6           | 6                 | 0.00          |
| Hispanic ethnicity                                               | 10                 | 15                         | 0.15          | 11          | 12                | 0.03          |
| Medicaid at time of dialysis initiation                          | 27                 | 34                         | 0.15          | 28          | 28                | 0.00          |
| <b>Reported comorbidities</b>                                    |                    |                            |               |             |                   |               |
| Cardiac disease, other <sup>a</sup>                              | 21                 | 20                         | 0.02          | 20          | 20                | 0.00          |
| Cerebrovascular disease                                          | 9                  | 11                         | 0.07          | 9           | 9                 | 0.00          |
| Coronary artery disease                                          | 21                 | 23                         | 0.05          | 22          | 22                | 0.00          |
| Diabetes mellitus                                                | 54                 | 64                         | 0.20          | 59          | 58                | 0.02          |
| Heart failure                                                    | 29                 | 25                         | 0.09          | 27          | 27                | 0.00          |
| Hyperkalemia                                                     | 3                  | 3                          | 0.00          | 3           | 3                 | 0.00          |
| Hyperlipidemia                                                   | 18                 | 17                         | 0.03          | 17          | 17                | 0.00          |
| Hypertension                                                     | 92                 | 96                         | 0.17          | 94          | 94                | 0.00          |
| Liver disease                                                    | 2                  | 1                          | 0.08          | 1           | 1                 | 0.00          |
| Peripheral vascular disease                                      | 15                 | 16                         | 0.03          | 15          | 15                | 0.00          |
| Pulmonary disease                                                | 15                 | 13                         | 0.06          | 14          | 14                | 0.00          |
| Tobacco use                                                      | 7                  | 7                          | 0.00          | 7           | 7                 | 0.00          |
| Days hospitalized in the first 90 days of dialysis (median, IQR) | 0 (0-0)            | 0 (0-0)                    | 0.11          | 0 (0-0)     | 0 (0-0)           | 0.02          |
| <b>Baseline medication use</b>                                   |                    |                            |               |             |                   |               |
| ACEI or ARB                                                      |                    |                            |               |             |                   |               |
| ACEI                                                             | 0                  | 58                         | NA            | 0           | 59                | NA            |
| ARB                                                              | 0                  | 35                         | NA            | 0           | 36                | NA            |
| Both                                                             | 0                  | 7                          | NA            | 0           | 6                 | NA            |
| Beta blocker                                                     | 63                 | 62                         | 0.02          | 63          | 62                | 0.02          |
| Calcium channel blocker                                          | 47                 | 64                         | 0.35          | 55          | 56                | 0.02          |
| Diuretic                                                         | 56                 | 66                         | 0.21          | 60          | 60                | 0.00          |
| Other antihypertensive <sup>b</sup>                              | 40                 | 49                         | 0.18          | 43          | 43                | 0.00          |
| Statin                                                           | 50                 | 61                         | 0.22          | 55          | 56                | 0.02          |
| Clopidogrel                                                      | 12                 | 13                         | 0.03          | 13          | 13                | 0.00          |
| Warfarin                                                         | 10                 | 7                          | 0.11          | 8           | 8                 | 0.00          |
| Other cardiovascular med <sup>c</sup>                            | 19                 | 25                         | 0.15          | 21          | 22                | 0.02          |
| <b>Dialysis characteristics</b>                                  |                    |                            |               |             |                   |               |
| Saw nephrologist prior to                                        | 88                 | 88                         | 0.00          | 89          | 89                | 0.00          |

|                                                         |                |                |      |                |                |      |
|---------------------------------------------------------|----------------|----------------|------|----------------|----------------|------|
| dialysis initiation                                     |                |                |      |                |                |      |
| Year initiated dialysis                                 |                |                |      |                |                |      |
| 2007                                                    | 15             | 19             | 0.11 | 16             | 17             | 0.03 |
| 2008                                                    | 17             | 21             | 0.10 | 19             | 20             | 0.03 |
| 2009                                                    | 15             | 17             | 0.05 | 16             | 16             | 0.00 |
| 2010                                                    | 29             | 25             | 0.09 | 27             | 27             | 0.00 |
| 2011                                                    | 25             | 18             | 0.17 | 22             | 21             | 0.02 |
| CAPD (vs. CCPD)                                         | 32             | 40             | 0.17 | 36             | 37             | 0.02 |
| <b>Vital signs and laboratory measurements</b>          |                |                |      |                |                |      |
| BMI (mean ± SD) <sup>d</sup>                            | 28.3 ± 5.8     | 29.0 ± 6.4     | 0.12 | 28.4 ± 7.9     | 28.8 ± 9.7     | 0.05 |
| Hemoglobin (g/dL, mean ± SD)                            | 10.7 ± 1.5     | 10.9 ± 1.5     | 0.13 | 10.8 ± 2.0     | 10.8 ± 2.2     | 0.00 |
| Albumin (g/dL, mean ± SD)                               | 3.8 ± 0.5      | 3.8 ± 0.5      | 0.00 | 3.8 ± 0.6      | 3.8 ± 0.7      | 0.00 |
| Baseline rGFR (ml/min, mean ± SD)                       | 7.9 ± 4.0      | 8.1 ± 4.0      | 0.05 | 7.9 ± 5.3      | 8.2 ± 6.0      | 0.05 |
| 24 hour urine volume (ml, median, IQR)                  | 850 (550-1350) | 923 (550-1500) | 0.07 | 850 (550-1300) | 900 (600-1400) | 0.03 |
| <b>Facility characteristics</b>                         |                |                |      |                |                |      |
| Number of PD patients (median, IQR) <sup>e</sup>        | 24 (14-39)     | 26 (14-40)     | 0.13 | 24 (15-39)     | 25 (14-39)     | 0.05 |
| ≥20                                                     | 62             | 65             | 0.06 | 63             | 62             | 0.02 |
| Rural <sup>f</sup>                                      | 14             | 15             | 0.03 | 15             | 15             | 0.00 |
| Geographic location (U.S. census division) <sup>g</sup> |                |                |      |                |                |      |
| East North Central                                      | 12             | 13             | 0.03 | 13             | 13             | 0.00 |
| East South Central                                      | 7              | 7              | 0.00 | 8              | 8              | 0.00 |
| Middle Atlantic                                         | 8              | 6              | 0.08 | 6              | 6              | 0.00 |
| Mountain                                                | 4              | 3              | 0.05 | 4              | 4              | 0.00 |
| New England                                             | 5              | 3              | 0.10 | 4              | 4              | 0.00 |
| Pacific                                                 | 11             | 16             | 0.15 | 13             | 13             | 0.00 |
| South Atlantic                                          | 29             | 27             | 0.04 | 28             | 28             | 0.00 |
| West North Central                                      | 11             | 8              | 0.10 | 10             | 10             | 0.00 |
| West South Central                                      | 13             | 15             | 0.06 | 14             | 14             | 0.00 |

1  
2  
3 All numbers are percentages unless indicated otherwise. ACEI angiotensin-converting enzyme inhibitor;  
4 ARB angiotensin-II receptor blocker; BMI body mass index; CAPD continuous ambulatory peritoneal  
5 dialysis; CCPD continuous cycling peritoneal dialysis; rGFR residual glomerular filtration rate; IQR  
6 interquartile range; IPTW inverse probability of treatment weighted; PD peritoneal dialysis; SD standard  
7 deviation; Std. Diff. standardized difference.

8  
9 <sup>a</sup> Includes atrial fibrillation, arrhythmias, implanted cardiac defibrillators, pacemakers, and valvular  
10 disease.

11 <sup>b</sup> Includes alfuzosin, aliskiren, clonidine, doxazosin, guanfacine, hydralazine, isosorbide, methyl dopa,  
12 minoxidil, prazosin, ranolazine, and terazosin.

13 <sup>c</sup> Includes ezetimibe, simvastatin, niacin, amiodarone, aspirin/dipyridamole, colestipol, colestipol,  
14 digoxin, dipyridamole, dronedarone, fenofibrate, flecainide, gemfibrozil, mexiletine, nitroglycerin,  
15 omega-3 acid ethyl esters, procainamide, propafenone, and quinidine.

16 <sup>d</sup> Missing for 2% of non-users and 1% of users.

- 1 <sup>e</sup> Based on the year the patient initiated dialysis.
- 2 <sup>f</sup> Facilities were considered urban if they were classified as a metropolitan area in the Rural–Urban
- 3 Commuting Area (RUCA) Codes version 2.0, which are based on 2000 Census commuting data and 2004
- 4 zip codes; all other areas were considered to be rural.<sup>1</sup>
- 5 <sup>g</sup> Facilities were categorized into one of nine U.S. Census Bureau Divisions based on their state.<sup>2</sup>

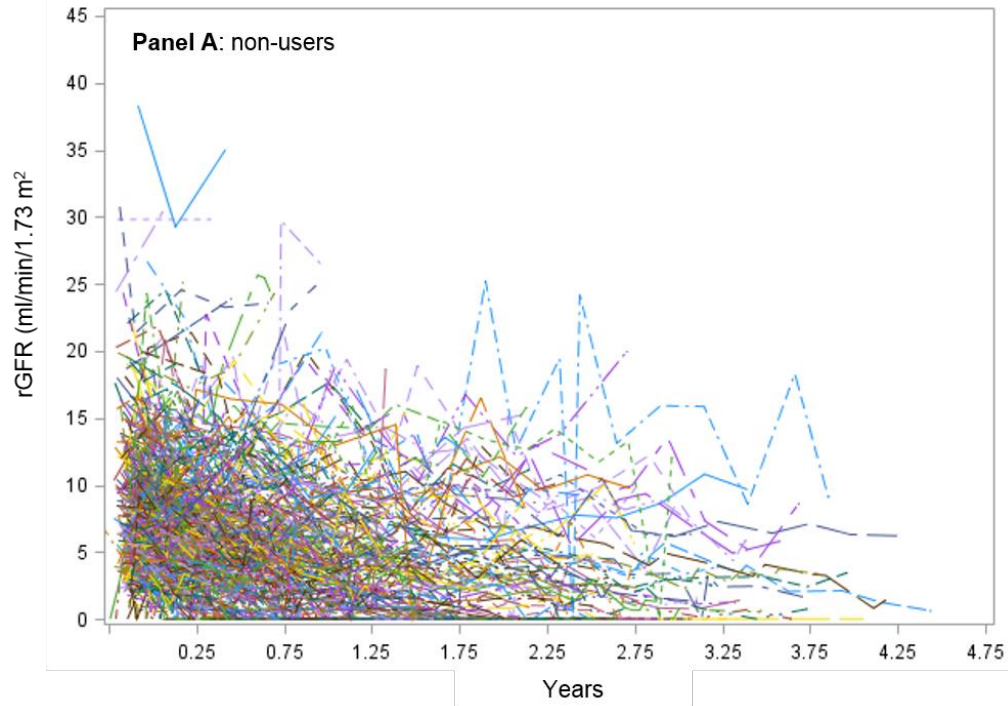

1

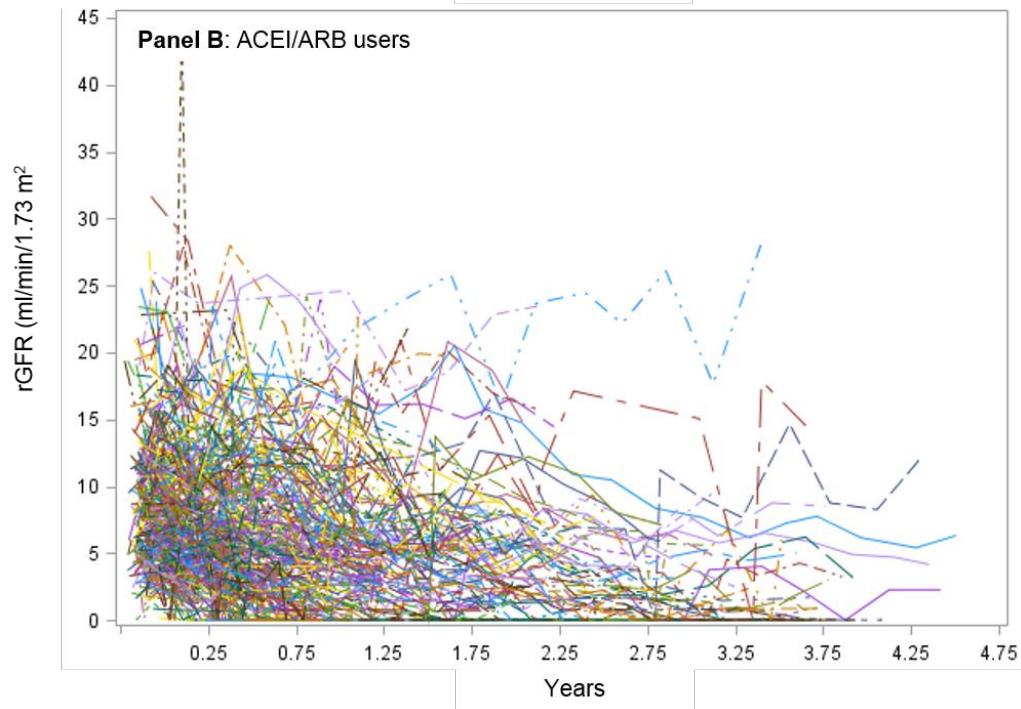

2

3

5 **Figure S1:** Spaghetti plots of residual glomerular filtration rate in Panel A) non-users, and  
 6 in Panel B) angiotensin-converting enzyme inhibitors (ACEI) and angiotensin-II receptor blockers (ARB)  
 users.



1 ***In-Depth Methods: Inverse Probability of Treatment Weighting Approach***

2 The use of the weights is a method to simulate what would have happened had everyone in the population  
3 experienced both levels of exposure.<sup>3</sup> A simple application of the weights creates a pseudo-population of  
4 double size but this double size does not imply higher precision because each individual is used twice. By  
5 applying stabilization (multiplying the weight by the probability of being exposed for those exposed and  
6 the probability of being unexposed for those unexposed), we are able to create a pseudo-population with  
7 similar percentage of patients exposed in each level of the covariates as the overall percentage in the  
8 study population. As explained in Hernan and Robins 2006, inverse probability of treatment weighting  
9 (IPTW) mimics a design I randomized experiment that eliminates selection bias by observed  
10 characteristics between warfarin users and non-users and with use of stabilized weights the pseudo-  
11 population has the same size as the original population.

12  
13 **Implementation** The following steps show how to implement IPTW:

14 *Step 1.* Run a multivariate logistic regression model to predict the probability of a patient being exposed  
15 ( $\hat{p}_{Ti}$ ), adjusted for all variables listed in Table 1 with the exception of body mass index.

16 *Step 2.* Compute a weight for each patient in each exposure group. For a patient  $i$  in the exposed group  
17 with  $N_T$  patients,  $w_i = \frac{1}{\hat{p}_i}$ , For a patient  $j$  in the unexposed group with  $N_C$  patients,  $w_j = \frac{1}{1-\hat{p}_j}$

18 *Step 3.* Compute the Stabilized Weights ( $sw$ ).<sup>4,5</sup> To compute stabilized weights one multiplies the weight  
19 found in Step 2 above by the probability of being exposed ( $p_T$ ) for those exposed and the  
20 probability of being unexposed for those unexposed ( $1 - p_T$ ). More specifically the stabilized  
21 weight,  $sw$ , is defined as: for a patient  $i$  in the exposed group,  $sw_i = p_T * w_i$  and for a patient  $j$  in  
22 the unexposed group,  $sw_j = (1 - p_T) * w_j$ , In our cohort, this would imply multiplying by 0.44  
23 for ACE/ARB users and 0.56 for ACE/ARB non-users which are the percentages of patients in  
24 the treated and not treated groups, respectively.

25 *Step 4.* If necessary, truncate weights to the value 10 (0.1) if stabilized weights are found to be too large  
26 (small).<sup>6</sup> As a check and also as a tool to decide on a model specification, the estimated weights  
27 are required to have a mean of 1 (approximately).<sup>5</sup>

28  
29 **Analysis** Comparison of statistics (mean, proportions) between exposed and unexposed in the pseudo-  
30 population can be done through the use of procedures (functions) that allow the use of weights. Similarly  
31 standardized differences were computed with the use of the weighted means, weighted proportions and  
32 weighted standard deviations. We used weighted robust Cox proportional hazards models to obtain  
33 parameter estimates and SE.

1 **References**

- 2
- 3 1. WWAMI Ruca Rural Health Research Center. [http://depts.washington.edu/uwruca/ruca-](http://depts.washington.edu/uwruca/ruca-data.php)
- 4 [data.php](http://depts.washington.edu/uwruca/ruca-data.php). Accessed January 5, 2012, 2012.
- 5 2. U.S. Census Bureau GD. Census Bureau Regions and Divisions with State FIPS Codes.
- 6 [http://www.census.gov/geo/www/reg\\_div.txt](http://www.census.gov/geo/www/reg_div.txt). Accessed January 5, 2012, 2012.
- 7 3. Hernan MA, Robins JM. Estimating causal effects from epidemiological data. *J Epidemiol*
- 8 *Community Health*. 2006;60(7):578-586.
- 9 4. Robins JM, Hernan MA, Brumback B. Marginal structural models and causal inference in
- 10 *epidemiology*. *Epidemiology*. 2000;11(5):550-560.
- 11 5. Cole SR, Hernan MA. Constructing inverse probability weights for marginal structural models.
- 12 *Am J Epidemiol*. 2008;168(6):656-664.
- 13 6. Harder VS, Stuart EA, Anthony JC. Propensity score techniques and the assessment of measured
- 14 covariate balance to test causal associations in psychological research. *Psychol Methods*.
- 15 2010;15(3):234-249.
- 16

STROBE Statement—Checklist of items that should be included in reports of *cohort studies*

|                              | Item No |     | Recommendation                                                                                                                                                                                    |
|------------------------------|---------|-----|---------------------------------------------------------------------------------------------------------------------------------------------------------------------------------------------------|
| Title and abstract           | 1       | ✓   | (a) Indicate the study's design with a commonly used term in the title or the abstract                                                                                                            |
|                              |         | ✓   | (b) Provide in the abstract an informative and balanced summary of what was done and what was found                                                                                               |
| <b>Introduction</b>          |         |     |                                                                                                                                                                                                   |
| Background/rationale         | 2       | ✓   | Explain the scientific background and rationale for the investigation being reported                                                                                                              |
| Objectives                   | 3       | ✓   | State specific objectives, including any prespecified hypotheses                                                                                                                                  |
| <b>Methods</b>               |         |     |                                                                                                                                                                                                   |
| Study design                 | 4       | ✓   | Present key elements of study design early in the paper                                                                                                                                           |
| Setting                      | 5       | ✓   | Describe the setting, locations, and relevant dates, including periods of recruitment, exposure, follow-up, and data collection                                                                   |
| Participants                 | 6       | ✓   | (a) Give the eligibility criteria, and the sources and methods of selection of participants. Describe methods of follow-up                                                                        |
|                              |         | N/A | (b) For matched studies, give matching criteria and number of exposed and unexposed                                                                                                               |
| Variables                    | 7       | ✓   | Clearly define all outcomes, exposures, predictors, potential confounders, and effect modifiers. Give diagnostic criteria, if applicable                                                          |
| Data sources/<br>measurement | 8*      | ✓   | For each variable of interest, give sources of data and details of methods of assessment (measurement). Describe comparability of assessment methods if there is more than one group              |
| Bias                         | 9       | ✓   | Describe any efforts to address potential sources of bias                                                                                                                                         |
| Study size                   | 10      | ✓   | Explain how the study size was arrived at                                                                                                                                                         |
| Quantitative variables       | 11      | ✓   | Explain how quantitative variables were handled in the analyses. If applicable, describe which groupings were chosen and why                                                                      |
| Statistical methods          | 12      | ✓   | (a) Describe all statistical methods, including those used to control for confounding                                                                                                             |
|                              |         | ✓   | (b) Describe any methods used to examine subgroups and interactions                                                                                                                               |
|                              |         | ✓   | (c) Explain how missing data were addressed                                                                                                                                                       |
|                              |         | ✓   | (d) If applicable, explain how loss to follow-up was addressed                                                                                                                                    |
|                              |         | ✓   | (e) Describe any sensitivity analyses                                                                                                                                                             |
| <b>Results</b>               |         |     |                                                                                                                                                                                                   |
| Participants                 | 13*     | ✓   | (a) Report numbers of individuals at each stage of study—eg numbers potentially eligible, examined for eligibility, confirmed eligible, included in the study, completing follow-up, and analysed |
|                              |         | ✓   | (b) Give reasons for non-participation at each stage                                                                                                                                              |
|                              |         | ✓   | (c) Consider use of a flow diagram                                                                                                                                                                |
| Descriptive data             | 14*     | ✓   | (a) Give characteristics of study participants (eg demographic, clinical, social) and information on exposures and potential confounders                                                          |
|                              |         | ✓   | (b) Indicate number of participants with missing data for each variable of interest                                                                                                               |
|                              |         | ✓   | (c) Summarise follow-up time (eg, average and total amount)                                                                                                                                       |
| Outcome data                 | 15*     | ✓   | Report numbers of outcome events or summary measures over time                                                                                                                                    |
| Main results                 | 16      | ✓   | (a) Give unadjusted estimates and, if applicable, confounder-adjusted estimates and their precision (eg, 95% confidence interval). Make clear which                                               |

|                          |    |   |                                                                                                                                                                            |
|--------------------------|----|---|----------------------------------------------------------------------------------------------------------------------------------------------------------------------------|
|                          |    |   | confounders were adjusted for and why they were included                                                                                                                   |
|                          |    | ✓ | (b) Report category boundaries when continuous variables were categorized                                                                                                  |
|                          |    | ✓ | (c) If relevant, consider translating estimates of relative risk into absolute risk for a meaningful time period                                                           |
| Other analyses           | 17 | ✓ | Report other analyses done—eg analyses of subgroups and interactions, and sensitivity analyses                                                                             |
| <b>Discussion</b>        |    |   |                                                                                                                                                                            |
| Key results              | 18 | ✓ | Summarise key results with reference to study objectives                                                                                                                   |
| Limitations              | 19 | ✓ | Discuss limitations of the study, taking into account sources of potential bias or imprecision. Discuss both direction and magnitude of any potential bias                 |
| Interpretation           | 20 | ✓ | Give a cautious overall interpretation of results considering objectives, limitations, multiplicity of analyses, results from similar studies, and other relevant evidence |
| Generalisability         | 21 | ✓ | Discuss the generalisability (external validity) of the study results                                                                                                      |
| <b>Other information</b> |    |   |                                                                                                                                                                            |
| Funding                  | 22 | ✓ | Give the source of funding and the role of the funders for the present study and, if applicable, for the original study on which the present article is based              |

\*Give information separately for exposed and unexposed groups.

**Note:** An Explanation and Elaboration article discusses each checklist item and gives methodological background and published examples of transparent reporting. The STROBE checklist is best used in conjunction with this article (freely available on the Web sites of PLoS Medicine at <http://www.plosmedicine.org/>, Annals of Internal Medicine at <http://www.annals.org/>, and Epidemiology at <http://www.epidem.com/>). Information on the STROBE Initiative is available at <http://www.strobe-statement.org>.
